# 1 Meta-Analysis Reveals the Vaginal 2 Microbiome is a Better Predictor of Earlier 3 Than Later Preterm Birth

4 Caizhi Huang<sup>1</sup>, Craig Gin<sup>2</sup>, Jennifer Fettweis<sup>3</sup>, Betsy Foxman<sup>4</sup>, Bizu Gelaye<sup>5</sup>, David A. MacIntyre<sup>6</sup>, Akila Subramaniam<sup>7</sup>,  
5 William Fraser<sup>8</sup>, Negar Tabatabaei<sup>8,9</sup>, and Benjamin Callahan<sup>1,2,✉</sup>

6 <sup>1</sup>NC State University, Bioinformatics Research Center

7 <sup>2</sup>NC State University, Department of Population Health and Pathobiology

8 <sup>3</sup>Virginia Commonwealth University, Department of Obstetrics and Gynecology

9 <sup>4</sup>University of Michigan, Thomas Francis School of Public Health

10 <sup>5</sup>Harvard T. H. Chan School of Public Health, Department of Epidemiology

11 <sup>6</sup>Imperial College London, March of Dimes Prematurity Research Centre, Department of Metabolism, Digestion and  
12 Reproduction

13 <sup>7</sup>University of Alabama at Birmingham, Obstetrics Gynecology and Maternal-Fetal Medicine

14 <sup>8</sup>University of Sherbrooke, Departments of Obstetrics and Gynecology

15 <sup>9</sup>University of Illinois College of Medicine, Department of Pharmacology and Regenerative Medicine

16 **High-throughput sequencing measurements of the vaginal microbiome have yielded intriguing potential**  
17 **relationships between the vaginal microbiome and preterm birth (PTB; live birth prior to 37 weeks of**  
18 **gestation). However, results across studies have been inconsistent. Here we perform an integrated analysis**  
19 **of previously published datasets from 12 cohorts of pregnant women whose vaginal microbiomes were**  
20 **measured by 16S rRNA gene sequencing. Of 1926 women included in our analysis, 568 went on to deliver**  
21 **prematurely. Substantial variation between these datasets existed in their definition of preterm birth,**  
22 **characteristics of the study populations, and sequencing methodology. Nevertheless, a small group of taxa**  
23 **comprised a vast majority of the measured microbiome in all cohorts. We trained machine learning (ML)**  
24 **models to predict PTB from the composition of the vaginal microbiome, finding low to modest predictive**  
25 **accuracy (0.28-0.79). Predictive accuracy was typically lower when ML models trained in one dataset**  
26 **predicted PTB in another dataset. Earlier preterm birth (<32 weeks, <34 weeks) was more predictable from**  
27 **the vaginal microbiome than late preterm birth (34 - 37 weeks), both within and across datasets. Integrated**  
28 **differential abundance analysis revealed a highly significant negative association between *L. crispatus* and**  
29 **PTB that was consistent across almost all studies. The presence of the majority (18 out of 25) of genera**  
30 **was associated with a higher risk of PTB, with *L. iners*, *Prevotella*, and *Gardnerella* showing particularly**  
31 **consistent and significant associations. Some example discrepancies between studies could be attributed**  
32 **to specific methodological differences, but not most study-to-study variations in the relationship between**  
33 **the vaginal microbiome and preterm birth. We believe future studies of the vaginal microbiome and PTB will**  
34 **benefit from a focus on earlier preterm births, and improved reporting of specific patient metadata shown to**  
35 **influence the vaginal microbiome and/or birth outcomes.**

36 meta-analysis | preterm birth | vaginal microbiome | machine learning

37 Correspondence: [benjamin.j.callahan@gmail.com](mailto:benjamin.j.callahan@gmail.com)

**NOTE: This preprint reports new research that has not been certified by peer review and should not be used to guide clinical practice.**

## 38 Introduction

39 Preterm birth (PTB), defined as live birth prior to 37 complete weeks of gestation, is the primary cause of neonatal  
40 morbidity and mortality worldwide with an average PTB prevalence of around 11% (Chawanpaiboon et al., 2019;  
41 Manuck et al., 2016). However, our current understanding of PTB is limited with no clear causative factor for the  
42 majority of PTBs (Ferrero et al., 2016). One of the known risk factors of PTB is bacterial-related inflammation in  
43 gestational tissue (Donders et al., 2009; Goldenberg et al., 2008), including bacterial vaginosis (BV) – a polymicrobial  
44 alteration of the vaginal microbiome characterized by depletion of *Lactobacillus* species and overgrowth of typically  
45 strict anaerobes (Onderdonk et al., 2016).

46 In the past decade, the development of high-throughput sequencing technologies has reformed the study of the  
47 human microbiome. High throughput sequencing of PCR-amplified marker genes (e.g., 16S rRNA gene), and  
48 shotgun metagenomic sequencing of total sample DNA are now widely used to measure the composition and  
49 functional potential of whole microbial communities. To date, at least 15 studies have used high-throughput  
50 sequencing to investigate the link between the vaginal microbiome and PTB, or preterm premature rupture of  
51 membranes (PPROM), which precedes between 30-40% of all PTB cases. All these studies employed a similar  
52 study design: (a) cohorts of pregnant women were recruited prospectively; (b) vaginal swabs were collected during  
53 the pregnancies; (c) birth outcomes (e.g., PTB) were recorded; (d) 16S rRNA gene sequencing was performed on a  
54 subset of women selected to meet pre-specified inclusion criteria and a target PTB to term birth (TB) ratio. However,  
55 these studies reported varied and sometimes inconsistent associations between the vaginal microbiome and PTB.  
56 For example, Romero et al. (2014) found that vaginal microbial composition was not different in PTBs and TBs in  
57 a cohort of 90 pregnant women (88% African American; PTBs <34 weeks). DiGiulio et al. (2015) reported that  
58 lower *Lactobacillus* and higher *Gardnerella* abundances in the vaginal microbiome were associated with a higher  
59 risk of PTB (55%+ white; PTBs <37 weeks). Callahan et al. (2017) replicated these findings in a study cohort  
60 drawn from the same population as DiGiulio et al. (2015), but not in a different cohort with a prior history of PTB  
61 (82% African American; PTBs <37 weeks). Kindinger et al. (2017) found a lack of *Lactobacillus crispatus* and  
62 *Lactobacillus iners* dominance were risk factors for PTB in a cohort of UK women (65% white; PTBs <34 weeks).  
63 Fettweis et al. (2019) reported lower *L. crispatus* abundance was a risk factor for PTB in a predominantly black cohort  
64 of women (75% African American; PTBs <37 weeks). These studies employed a variety of different sequencing  
65 methodologies, including targeting different regions of the 16S rRNA gene, and varied in how they included and  
66 reported spontaneous versus indicated preterm births.

67 The substantial heterogeneities between previous studies almost certainly contribute to the variation in reported  
68 associations between the vaginal microbiome and PTB. These studies were highly heterogeneous in (1) the  
69 population being sampled (e.g., maternal race, BMI and age), (2) study size, (3) technical choices in microbiome  
70 profiling methods (e.g., DNA extraction method, 16S rRNA gene hypervariable region) and (4) definitions of term birth  
71 (TB) and PTB (e.g., spontaneous and indicated PTB, early and late PTB). Black women have a higher risk of PTB and  
72 BV compared to white women (Schaaf et al., 2013), and these study cohorts have very different racial compositions.  
73 Advanced maternal age is considered a risk factor of PTB, yet it is rarely accounted for in studies investigating the  
74 vaginal microbiome in pregnancy (Waldenström et al., 2014). Standard primers for the V4 hypervariable region  
75 of the 16S rRNA gene have higher sensitivity to the important *Gardnerella* genus compared with common V1-V3  
76 primers (Frank et al., 2008; Mizrahi-Man et al., 2013). The mechanisms of spontaneous and indicated PTB might be  
77 different as spontaneous PTB is usually related to preterm rupture of membranes (PPROM) or cervical dilation while  
78 indicated PTB is related to induced or cesarean section labor due to obstetrical complications (Stout et al., 2014).  
79 Similarly, early PTB (< 32), moderate PTB (>= 32, < 34), and late PTB (>= 34, < 37) might be related to different  
80 causative factors, with an infectious etiology more commonly associated with early PTB (Goldenberg and Culhane,  
81 2003). Lack of power also contributes to inconsistencies in reported associations. Many of these studies have small  
82 sample sizes — 12 cohorts included less than 50 women that experienced PTB, and 7 cohorts had an overall sample  
83 size of less than 100. This lack of power is exacerbated by the typically untargeted analyses that must account for  
84 the tens to thousands of taxa being simultaneously investigated.

85 In a meta-analysis, the results from multiple studies regarding a common biological question are synthesized  
86 to achieve greater power and generalizability of the conclusions. For example, two meta-analyses of the gut  
87 microbiome and colorectal cancer (CRC) performed integrated analyses of multiple metagenomic CRC datasets  
88 to reveal consistent associations between the gut microbiome and CRC and to better understand the reproducibility  
89 of such associations across studies (Thomas et al., 2019; Wirbel et al., 2019). Meta-analysis can help identify factors  
90 that cause inconsistencies between studies, aggregate signals across studies to improve power, and point the way  
91 towards improvements in future study design and analysis. Haque et al. (2017) pooled 4 vaginal microbiome datasets  
92 to understand the temporal differences between the vaginal microbiome communities and found the diversity  
93 measures are significantly different between vaginal microbiomes sampled from women with term and preterm  
94 outcomes. However, they did not look into the role of specific genera or species. Kosti et al. (2020) aggregated 5

95 longitudinal vaginal microbiome datasets with batch correction and reported several microbial genera as associated  
96 with PTB. However, they did not explore the heterogeneity cross-study and did not perform predictive analyses.  
97 [Gudnadottir et al. \(2022\)](#) performed a network-based meta-analysis of 17 longitudinal vaginal microbiome datasets  
98 using community state types (CSTs). Their results supported the predictivity of preterm birth using the vaginal  
99 microbiome but did not build any prediction models and CSTs reduce the description of the vaginal microbiome to  
100 the identity of its most abundant member.

101 In this study, we performed a meta-analysis of 12 prospective case-control PTB datasets obtained by using 16S rRNA  
102 gene sequencing to measure the vaginal microbiome during pregnancy. All together, these 12 datasets included  
103 1926 pregnant women, 568 of whom went on to deliver preterm. After re-processing the raw sequencing data  
104 using a consistent bioinformatics pipeline, we used a machine learning approach to investigate the predictability of  
105 PTB from the composition of the vaginal microbiome in each study ([Pasolli et al., 2016](#); [Topçuoğlu et al., 2020](#)).  
106 We evaluated cross-dataset reproducibility of PTB predictions from the vaginal microbiome, and investigated PTB  
107 and study-specific factors that affected prediction accuracy. We explored the association between specific microbial  
108 taxa and PTB within and across studies. Finally, we synthesized these results into specific recommendations and  
109 cautions applicable to future study of the vaginal microbiome in PTB, and perhaps to the study of microbiomes in  
110 health and disease more broadly.

## 111 Results

### 112 Published studies of the vaginal microbiome in term and preterm births are highly heterogeneous

113 We searched the published literature for studies between 2014 and 2020 that used high-throughput 16S rRNA gene  
114 sequencing to characterize the vaginal microbiome during pregnancy in term and preterm births. We identified 15  
115 such studies, all of which used some variation of a nested case-control study design drawn from larger cohorts  
116 of women who were prospectively enrolled and sampled during pregnancy. From these 15 studies, we identified  
117 12 datasets from independent cohorts of women that were complete enough (raw sequencing data and sufficient  
118 metadata) for us to include in this meta-analysis (Table 1; Methods). In total, these datasets include 6,891 vaginal  
119 microbiome samples from 2,023 pregnant women, 570 of whom had preterm births.

120 There was a large amount of heterogeneity in technical, clinical and cohort characteristics among these studies  
121 of the vaginal microbiome in term and preterm births. The number of subjects in the datasets we included in our  
122 meta-analysis varied from a low of 38 to a high of 539, and the percentage of subjects who went on to have preterm  
123 births varied from a low of 20% to a high of 81%, respectively. In terms of gestational age at sampling, three datasets  
124 (Ki, Bl, and Ta) obtained samples only from first trimester (0 - 13 weeks) or early of second trimester (14 - 26 weeks).  
125 Su datasets obtained samples only from late second trimester. All other eight datasets obtained samples across  
126 all trimesters. Furthermore, seven datasets are from longitudinal studies, with averages from 2.1 to 25 samples  
127 per subject. Furthermore, six datasets have subjects that included samples from all three trimesters. The number  
128 of subjects sampled in all trimesters varied from 3 to 45, and the number of those subjects who experienced PTB  
129 varied from 1 to 12 (Supplementary Figure S1; Supplementary Table S1). The V1-V2 region of the 16S rRNA gene  
130 was sequenced in five of these datasets, and the V4 gene region in the other seven. Four datasets had most  
131 participants self-report their race as black and six datasets had a majority of participants self-report their race as  
132 white. Three datasets excluded late PTB ( $\geq 34$ ,  $< 37$ ) or early TB ( $\geq 37$ ,  $< 39$ ), while all other datasets included  
133 these two categories. Seven datasets only included spontaneous PTB and at least two other datasets included both  
134 spontaneous and indicated PTB. The distributions of gestational age at delivery and select population characteristics  
135 also varied substantially between datasets (Supplementary Figures S2 & S3).

**Table 1.** Characteristics of the 16S rRNA gene sequencing and study cohorts for each dataset included in this meta-analysis.

| Dataset               | Sequencing Region | No. of Subjects (PTB**) | No. of samples | Maternal BMI*** | Maternal Age*** | Maternal Race | Gestational age at sampling *** | Reference                 |
|-----------------------|-------------------|-------------------------|----------------|-----------------|-----------------|---------------|---------------------------------|---------------------------|
| Brown2018 (Br)*       | V1-V2             | 192 (157)               | 374            | 25 (18-42)      | 33 (19-51)      | 43/50/84/0    | 22 (6-36)                       | Brown et al. (2018, 2019) |
| Fettweis2019 (Fe)     | V1-V3             | 135 (45)                | 546            | -               | -               | 0/101/21/13   | 28 (3-41)                       | Fettweis et al. (2019)    |
| Kindinger2017 (Ki)    | V1-V3             | 161 (34)                | 161            | 25 (18-48)      | 33 (21-42)      | 27/30/104/0   | 16 (16-16)                      | Kindinger et al. (2017)   |
| Romero2014 (Ro)       | V1-V3             | 90 (18)                 | 349            | 30 (19-54)      | 25 (17-43)      | 1/79/5/5      | 26 (6-41)                       | Romero et al. (2014)      |
| Stafford2017 (St)     | V1-V3             | 133 (26)                | 158            | -               | 29 (16-42)      | 4/8/110/11    | 24 (15-35)                      | Stafford et al. (2017)    |
| DiGiulio2015 (Di)     | V3-V5             | 40 (11)                 | 996            | 28 (18-50)      | 30 (19-41)      | 7/2/22/9      | 25 (1-40)                       | DiGiulio et al. (2015)    |
| Elovitz2019 (El)      | V4                | 539 (107)               | 1505           | -               | -               | 0/399/115/25  | - (16 - 28)                     | Elovitz et al. (2019)     |
| Blostein2020 (Bl)     | V4                | 125 (25)                | 135            | 26 (18-37)      | 28 (18-44)      | -             | 9 (<16)                         | Blostein et al. (2020)    |
| ST_Callahan2017 (SC)  | V4                | 39 (9)                  | 897            | 25 (18-51)      | 33 (25-42)      | 4/1/22/12     | 24 (2-41)                       | Callahan et al. (2017)    |
| Subramaniam2016 (Su)  | V4                | 38 (19)                 | 38             | 25 (16-38)      | 22 (15-35)      | 0/18/20/0     | - (21 - 25)                     | Subramaniam et al. (2016) |
| Tabatabaei2019 (Ta)   | V4                | 450 (94)                | 450            | 24 (13-51)      | 31 (20-44)      | 19/31/322/78  | - (8 - 13)                      | Tabatabaei et al. (2019)  |
| UAB_Callahan2017 (UC) | V4                | 96 (41)                 | 1282           | 31 (16-73)      | 27 (17-38)      | 1/79/9/7      | 27 (11-41)                      | Callahan et al. (2017)    |

\* Dataset Brown2018 was combined from Brown et al. (2018) and Brown et al. (2019).

\*\* PTB: Preterm birth, live birth prior to 37 completed weeks of gestation.

\*\*\* Maternal BMI, age and gestational age at sampling were summarized as mean (range).

\*\*\*\* Maternal race was categorized as Asian/Black/White/Other.

### 136 A limited set of core taxa make up a vast majority of the vaginal microbiome

137 We used a consistent bioinformatic protocol based on the DADA2 tool and the Silva reference database to generate  
138 tables of taxonomically-assigned amplicon sequence variants (ASVs) from the raw 16S sequencing data for each  
139 dataset (Supplementary Tables S2 & S3; Methods). To work at the highest level of resolution possible, datasets were  
140 partitioned into the V1-V2 or V4 groups based on which region of the 16S gene was sequenced. Within each group,  
141 ASVs were truncated to the "intersection" region contained within all sequenced amplicons, allowing an ASV table  
142 containing all datasets in the group to be constructed. For analyses using all datasets combined, taxonomic profiles  
143 at the genus level (with special species-level discrimination performed within the *Lactobacillus* genus) were merged  
144 into a single table.

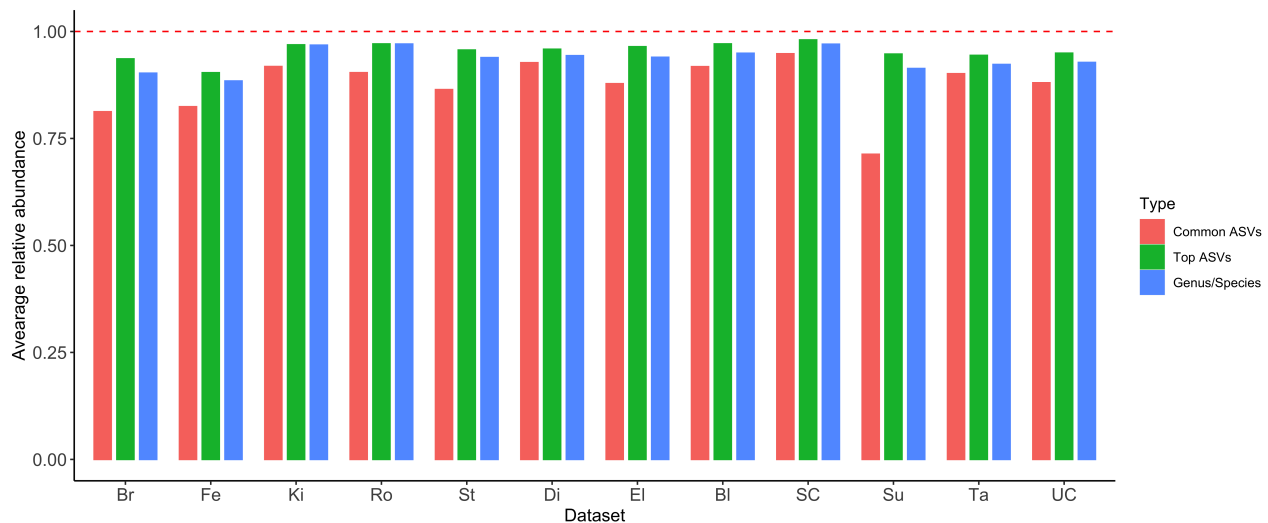

**Figure 1.** The average proportion of all sequencing reads in each dataset derived from the set of common ASVs (found in every dataset), top ASVs (proportion larger than 0.1% in any dataset) and core genus-level taxonomic features (abundance > 0.1% and prevalence > 10% for at least 5 datasets). Note that common and top ASV features were determined within the V1V2 and V4 dataset groups independently, as non-overlapping ASVs are not directly comparable (Methods).

145 A small number of taxa comprised a large majority of the vaginal microbiome in all studies included in our  
 146 meta-analysis. In the V1-V2 group we found 42 “common” ASVs that were present in all datasets, and 157 “common”  
 147 ASVs in the V4 group (Supplementary Table S4). These common ASVs constituted a large majority of the vaginal  
 148 microbiome in every dataset in both the V1-V2 and V4 groups (71.3% - 94.8% of total reads). Another frequent  
 149 strategy that is used to select a set of cross-dataset taxonomic features is to consider all taxa that appear above  
 150 some abundance threshold in any dataset. Here we defined “top” ASVs as those that had a relative abundance  
 151 larger than 0.1% in any dataset. We found 172 top ASVs and 159 top ASVs in the V4 group and the V1-V2 group,  
 152 respectively. This still modest number of ASVs constituted an overwhelming majority of the vaginal microbiome in  
 153 every dataset (90.4% - 98.0% total reads; 349 - 5479 ASVs). Finally, we also selected a set of “core” genera from  
 154 the all-study table (both V1-V2 and V4 studies classified at the genus level, with *Lactobacillus* discriminated at the  
 155 species level) using a hybrid filtering strategy that kept all genera present in at least 0.1% abundance and 10%  
 156 prevalence in at least 5 datasets. Just 25 “core” genus-level taxa made up 88.4% - 97.1% of the total reads in every  
 157 dataset (Figure 1; Supplementary Figures S4 & S5). Five genera had particularly high average relative abundance  
 158 (> 0.05) and prevalence (> 40%): *L. iners* (0.35, 87%), *L. crispatus* (0.29, 78%), *L. jensenii* (0.06, 57%), *L. gasseri*  
 159 (0.057, 46%), and *Gardnerella* (0.054, 56%).

## 160 The predictivity of preterm birth from the vaginal microbiome is low

161 We employed a machine learning (ML) approach to assess the predictability of preterm birth outcomes from the  
 162 genus-level composition of the vaginal microbiome. In order to assess the generalizability of ML predictions,  
 163 we performed three types of ML analyses – intra-dataset analyses in which the ML model is trained and tested  
 164 within a single dataset, cross-dataset analyses in which the ML model is trained on one dataset and tested on  
 165 another, and leave-one-dataset-out (LODO) analyses in which 11 of 12 datasets are pooled together for training and  
 166 testing is performed on the left-out dataset (Figure 2A; Methods). Based on our evaluation of overall performance  
 167 (Supplementary Figures S6 & S7; Supplementary Methods) and precedent in the microbiome field, we used the  
 168 random forest classifier and either proportions or centered log-ratio (CLR) transformed abundances as our ML  
 169 features. We used the area under the receiver operating characteristic curve (AUC) as our primary measure of  
 170 ML prediction accuracy.

171 The predictivity of PTB from the vaginal microbiome varied substantially across studies. Intra-dataset AUCs ranged  
 172 from 0.32 (no predictivity) to 0.68 (moderate predictivity) across the datasets we considered (Figure 2B, values in the  
 173 major diagonal). We did not discern an obvious pattern amongst the higher or lower-predictivity datasets. There was  
 174 no clear increase in AUC with study size: low intra-study AUC (0.52) was obtained in the relatively well-powered Ta  
 175 study (n=450) while the highest intra-study AUC was in the relatively low power SC study (n=39). The three studies  
 176 (Br, Ro, and SC) with the highest AUCs (0.67-0.68) include cohorts with predominantly white and predominantly  
 177 black racial backgrounds, cohorts from California, Michigan and the United Kingdom, and variously considered both  
 178 all-cause and only spontaneous preterm births.

179 The predictivity of PTB by ML models trained on data from a different dataset was generally low. In the cross-dataset

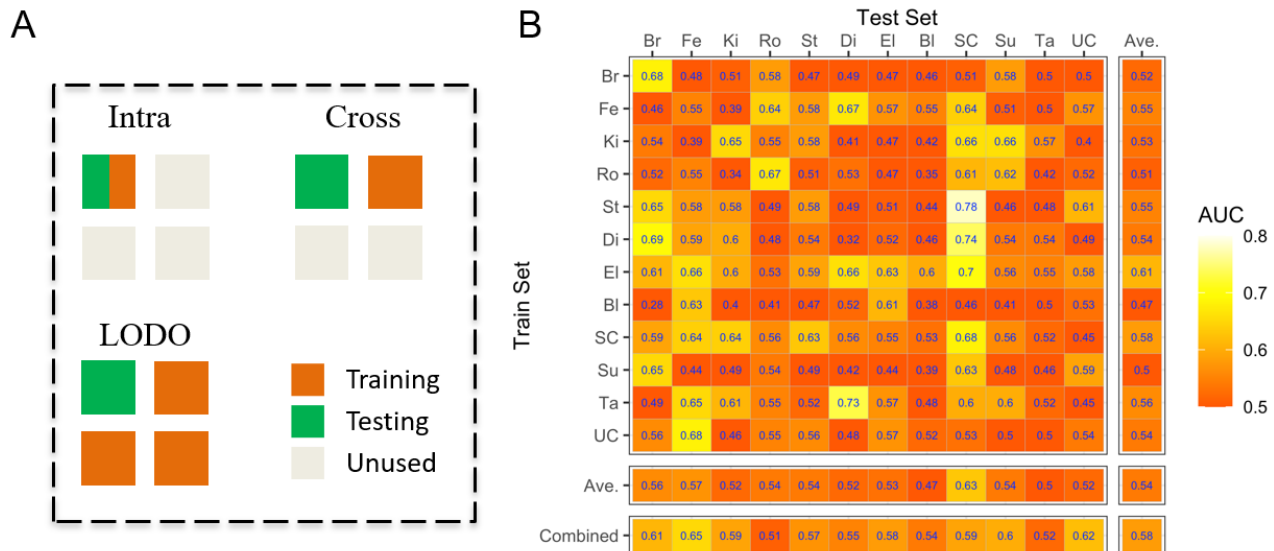

**Figure 2.** (A) A schematic of different analytical strategies using machine learning. Each square represents a different dataset, and squares are colored by how they are used to train or test the ML model. (B) The prediction accuracy, as measured by the AUC, for random forest ML models trained on the vaginal microbiome profiles (genus-level proportions) in one dataset (rows) and tested in the same or a different dataset (columns). “Ave.” indicates the average AUC of each row (same training dataset) or each column (same testing dataset).

180 analyses – in which the ML model is trained on one dataset and then used to predict on a different dataset – only  
 181 22% of training/testing dataset pairs yielded AUCs larger than 0.6, and just 3% had AUCs larger than 0.7. There was  
 182 some indication that certain datasets were easier, or harder, to predict PTB in than others (columns of Figure 2B).  
 183 AUCs for predictions in the SC dataset were greater than 0.6 for ML models trained on most other datasets, while  
 184 the AUCs for predictions in the Ta study never exceeded 0.57 for any training dataset. The leave-one-dataset-out  
 185 (LODO) analysis yielded slight increases in AUC in 10 out of 12 datasets compared to the average cross-dataset  
 186 AUC. While similar in direction to the previous results in the meta-analysis of the gut microbiome in [Thomas et al.](#)  
 187 [\(2019\)](#) and [Wirbel et al. \(2019\)](#), the magnitude of the increase in prediction accuracy obtained by pooling datasets  
 188 together for ML training was much smaller than observed in those studies.

### 189 Earlier Preterm Birth Is More Predictable Than Late Preterm Birth

190 Preterm birth is a syndrome with multiple causes, the relative importance of which may vary between different  
 191 populations, and between different sub-categories of preterm birth. One important subdivision of preterm birth is  
 192 based on gestational age at delivery, with morbidity and mortality increasing sharply with earlier preterm births. Here,  
 193 we used information available from each study about gestational age at delivery to define three PTB subgroups: (1)  
 194 early preterm births (< 32 weeks); (2) early or moderate preterm births (< 34 weeks); and (3) late preterm births (>= 34  
 195 and < 37 weeks). Seven datasets had sufficient numbers of PTBs in each subgroup (8+) to include in our analysis.  
 196 We employed intra-dataset and cross-dataset ML approaches to compare the predictivity of early, moderate and late  
 197 preterm births, with the control group set to full-term births (>= 39 weeks). To completely remove any potential effect  
 198 of preterm birth sample size from the results, within each study we resampled the number of women in each PTB  
 199 subgroup to the smallest number of women among all subgroups (Methods). Unfortunately, due to both a lack of  
 200 available data in some studies and the exclusion of indicated preterm births in other studies, we were unable to  
 201 perform a similar analysis comparing indicated and spontaneous preterm births.

202 Earlier preterm births were much easier to predict from the composition of the vaginal microbiome than were later  
 203 preterm births. The accuracy for predicting late PTB was low to moderate in all intra-dataset and cross-dataset ML  
 204 analyses (all AUC values <= 0.65, Figure 3C). In contrast, the accuracy for predicting early PTB was acceptable  
 205 to good in most datasets (21 AUC values >= 0.65, 7 AUC values > 0.75, Figure 3C). Classification accuracy for  
 206 early-to-moderate PTB was intermediate, as expected. In most datasets the intra-dataset and LODO accuracy for  
 207 predicting early PTB were substantially better than late PTB (Figure 3A and 3B), but the Fe dataset was an exception  
 208 where classifier performance remained poor (AUC < 0.6) for all categories of PTB. Similar results were observed  
 209 whether using proportions or CLR-transformed abundances as the features in the analysis (Supplementary Figure  
 210 S8).

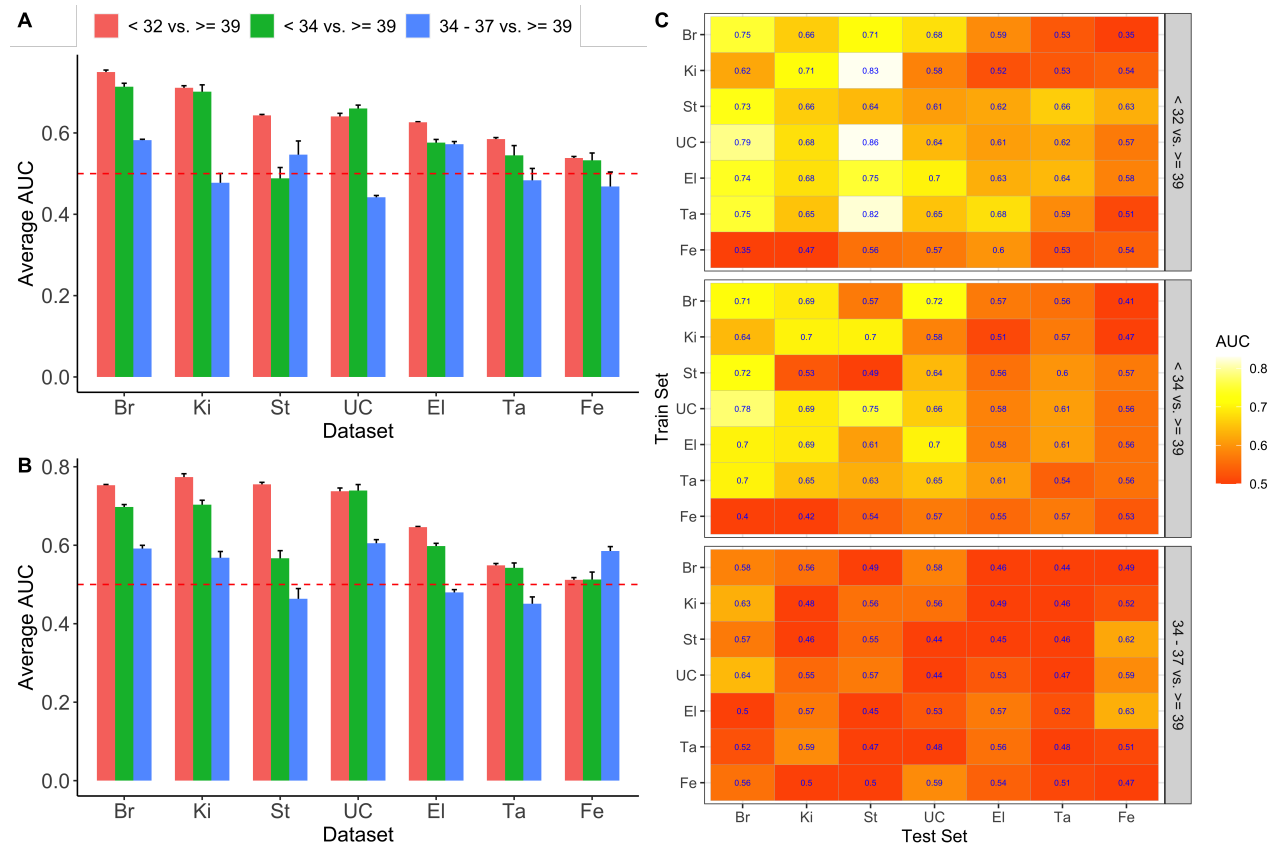

**Figure 3.** Assessment of prediction performance for different preterm birth groups using intra-dataset analysis (A), LODO analysis (B) and cross-dataset analysis (C) using CLR-transformed data. A resample procedure is used to ensure each preterm birth group has the same sample size. The experiment is repeated 10 times and the average AUC and/or standard error are calculated. For each heatmap, diagonal AUC values are from intra-analysis, and off diagonal values are from cross-analysis.

### 211 More Resolved Taxonomic Features Inconsistently Improved the Predictivity of PTB

212 We compared the prediction accuracy of our random forest ML models trained on the proportions of taxonomic  
 213 features at different levels of resolution, from ASV up to Phylum (Table 2). In intra-dataset analysis, ASV level  
 214 features had the overall best performance for the V1-V2 group, and there was an overall trend of decreasing AUC  
 215 with increasingly broad taxonomic features. However, this trend was not evident in the V4 group (Table 2). In both  
 216 the V1-V2 and V4 groups of datasets, the AUC measured in the cross-dataset and LODO analyses showed no clear  
 217 trend with the breadth of the taxonomic features considered. Given the previous observation that earlier preterm  
 218 birth is more predictable, we further investigated the prediction accuracy at different levels of feature resolution using  
 219 only early PTB (< 32 weeks) and late-term birth (>= 39 weeks). In the V1-V2 group, we observed the same overall  
 220 trend of decreasing AUC with increasingly broad taxonomic features consistently in intra-dataset, cross-dataset, and  
 221 LODO analysis. However, we again did not see a similar trend in the V4 group of datasets (Supplementary Table  
 222 S5).

**Table 2.** Average AUC values for different taxa level features.

| Analysis | V1-V2 group |       |        |       |       |        | V4 group |       |        |       |       |        |
|----------|-------------|-------|--------|-------|-------|--------|----------|-------|--------|-------|-------|--------|
|          | ASV         | Genus | Family | Order | Class | Phylum | ASV      | Genus | Family | Order | Class | Phylum |
| Intra    | 0.65        | 0.63  | 0.60   | 0.57  | 0.58  | 0.55   | 0.58     | 0.57  | 0.59   | 0.56  | 0.52  | 0.54   |
| Cross    | 0.53        | 0.54  | 0.57   | 0.56  | 0.56  | 0.57   | 0.57     | 0.56  | 0.56   | 0.55  | 0.53  | 0.55   |
| LODO     | 0.56        | 0.57  | 0.57   | 0.58  | 0.60  | 0.61   | 0.60     | 0.62  | 0.61   | 0.60  | 0.56  | 0.59   |

## 223 The Importance of Microbial Taxa to Machine Learning Models Varies Across Datasets

224 We further investigated the ML models by computing the importance of genus-level microbial features using SHAP  
 225 (SHapley Additive exPlanations) values (Lundberg and Lee, 2017). Figure 4 shows the feature ranking for each  
 226 study for random forest models trained on proportional data. Averaged across all datasets, *L. crispatus* is the  
 227 taxa that contributes most to the machine learning predictions, followed by *Prevotella* and *L. iners*. However, there  
 228 is substantial variation in the importance of most taxa in ML models trained on different datasets. Consider, for  
 229 example, *Finegoldia*. There are three datasets for which *Finegoldia* is among the three most important taxa and two  
 230 studies for which it is among the three least important taxa. *Mycoplasma* is ranked as the most important taxa for  
 231 the BI dataset and the least important taxa for the Ta dataset. Further inconsistencies can be seen by examining the  
 232 SHAP summary plot for each dataset (Supplementary Figure S9). For most studies for which *Prevotella* is among  
 233 the most important features, a high relative abundance of *Prevotella* is associated with preterm birth (see the Br, Ki,  
 234 and St datasets). However, a high relative abundance of *Prevotella* is associated with term birth in the BI dataset.

235 The varying importance of taxa in different datasets contributes to the lower prediction accuracy for PTB in the  
 236 cross-dataset and leave-one-dataset-out (LODO) analyses. As an example, *Aerococcus* was the most important  
 237 feature for the Ro dataset but was unimportant for all other datasets. Machine learning models trained on the Ro  
 238 study heavily weight the abundance of *Aerococcus* in their predictions, even though *Aerococcus* is a poor predictor  
 239 of preterm birth in other datasets. We trained ten random forests on the Ro dataset with and without including  
 240 *Aerococcus* as a feature and made predictions on the other studies (Supplementary Figure S10). For most studies,  
 241 the AUC was higher when excluding *Aerococcus* from Ro, with notable improvements for the Fe, Di, SC, and Su  
 242 studies.

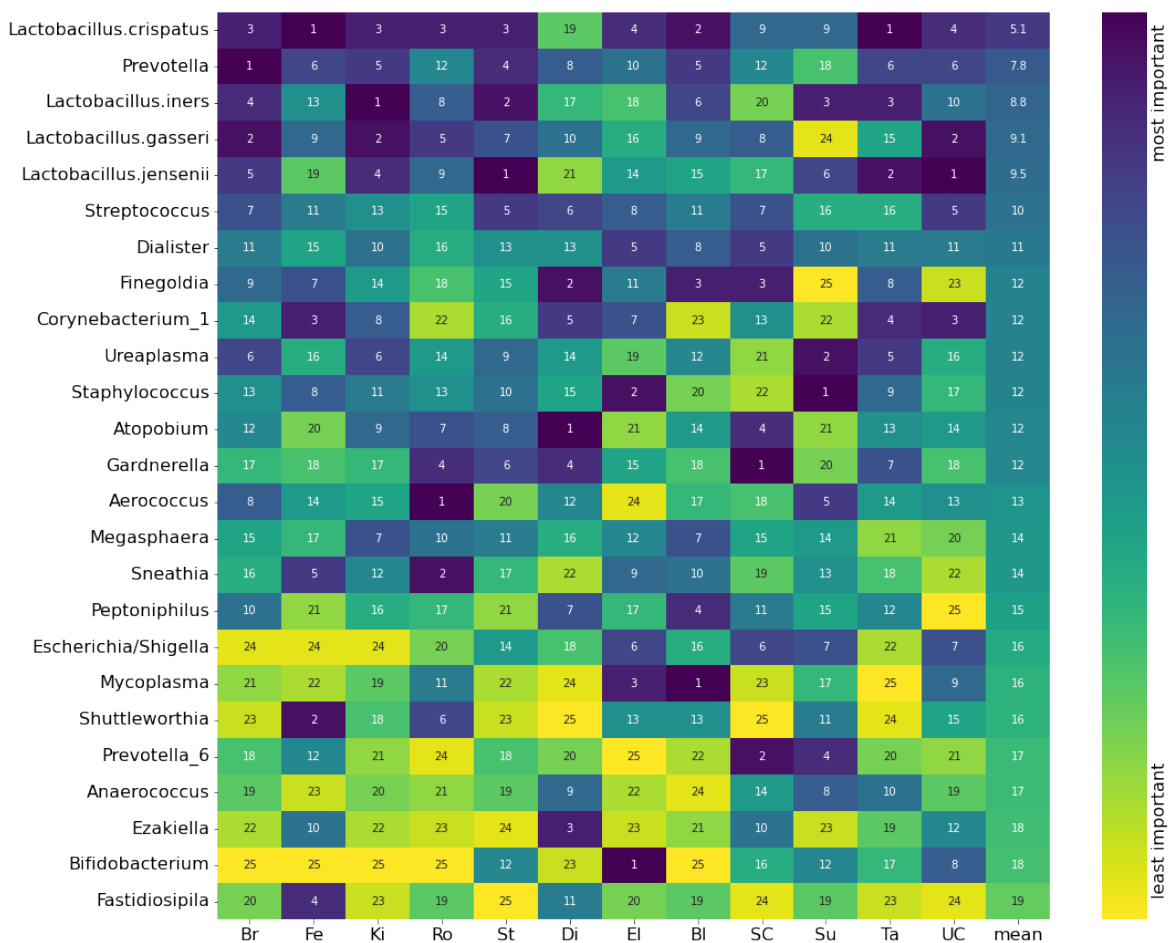

**Figure 4.** The feature importance ranking for genus-level taxonomic features (rows) in random forest ML models trained in different datasets (columns). Feature importance was quantified as the absolute SHAP value. Genera are ordered by their mean importance rank across all datasets.



## 243 Emerging consensus associations between microbial genera and PTB

244 At an individual dataset level, differential abundance (DA) analysis using the one-sided Wilcoxon rank-sum test found  
 245 associations between bacterial genera and PTB that largely agreed with the results reported in the original papers  
 246 (Supplementary Figure S11). This re-analysis confirms that for many genera, there is too much variation in the effect  
 247 sizes and even direction of their association with PTB to draw robust conclusions from individual dataset analyses.  
 248 This is unsurprising given the low power of many of these datasets. However, taxa with more consistent directions  
 249 of effect did emerge from when considering all the individual dataset DA results. In particular, *L. crispatus* was  
 250 negatively associated with preterm birth in 10/12 datasets and *Gardnerella* was positively associated with preterm  
 251 birth in 11/12 datasets.

252 In order to increase power, we performed an all-dataset differential prevalence analysis that also accounted for  
 253 maternal age, BMI and self-reported race. We created a prevalence (presence-absence) table at the genus level  
 254 for each study by defining a genus as present in a sample if its proportion was greater than 0.1%. We fit a  
 255 generalized linear mixed model (GLMM) to estimate the odds ratio between a genus is present versus absent with  
 256 dataset-specific random effects separately for each genus (Figure 5; Supplementary Figure S12; Methods). The  
 257 presence of three *Lactobacillus* species - *L. crispatus*, *L. jensenii* and *L. gasseri* - were associated with reduced risk  
 258 of PTB, while the presence of *L. iners* was associated with increased risk of PTB. Based on unadjusted p-value at  
 259 a 0.05 level, we observed significant associations of *L. iners* ( $p = 0.043$ ) and *L. crispatus* ( $0.007$ ). The presence of  
 260 most non-*Lactobacillus* genera (18 out of 21; Figure 5A) was associated with a higher risk of PTB, consistent with  
 261 a higher-diversity “bacterial-vaginosis-like” vaginal microbiome being associated with PTB. There were significant  
 262 positive associations between PTB and the presence of *Gardnerella* ( $p = 0.002$ ), *Shuttleworthia* ( $p = 0.02$ ), *Prevotella*  
 263 ( $p = 0.0002$ ), *Megasphaera* ( $p = 0.0007$ ), *Atopobium* ( $p = 0.0001$ ), *Sneathia* ( $p = 0.003$ ), *Streptococcus* ( $p = 0.04$ ),  
 264 *Dialister* ( $p = 0.03$ ) and *Mycoplasma* ( $p = 0.008$ ). We further investigated these associations in PTBs subdivided into  
 265 early, moderate and late subgroups as previously described (See Methods). We found that the associations between  
 266 PTB and *L. iners*, *L. crispatus*, and *Prevotella* were stronger, i.e., had larger effect sizes and were more statistically  
 267 significant, in earlier PTB than in late PTB (Supplementary Figure S13).

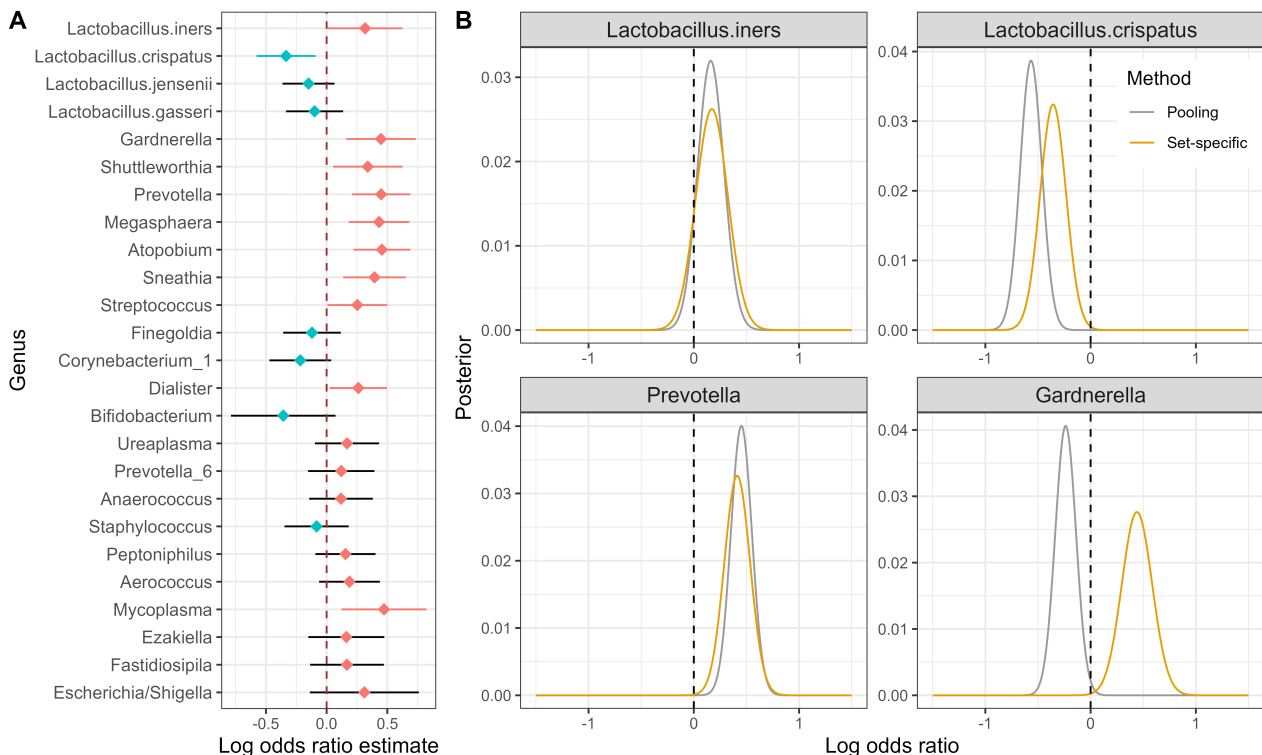

**Figure 5.** Cross-dataset differential abundance analysis. A: point estimates and 95% confidence interval of log odds ratio between a genus present and absent based on a relative abundance of 0.001 for each genus using a generalized linear mixed model. The model included all 12 datasets and no population characteristic covariates. Point estimates less than 0 are shown as blue points and greater than 0 as red points. Confident intervals less than 0 are shown as blue bars and greater than 0 as red bars. B: posterior distribution of log odds ratio using pooling and set-specific methods for four selected genus/species.

268 **Ignoring dataset-specific characteristics in microbiome analyses can cause false signals**

269 We developed two related Bayesian analyses of the association between genus prevalence and PTB, one in which  
270 datasets were pooled together as exchangeable equals (Pooling) and another in which the baseline rate at which a  
271 taxon was detected was allowed to vary among datasets (Set-specific). More specifically, we performed two Bayesian  
272 analyses in which the log odds of a genus to be present given preterm birth and the odds ratio of PTB relative to  
273 TB follow prior distributions. We calculated the posterior distribution of the odds ratio between PTB and TB using  
274 two methods: (1) Pooling, in which all datasets were combined as a large dataset; and (2) Set-specific, in which  
275 the posterior distribution of the association between genus prevalence and preterm birth was sequentially updated  
276 by application to each dataset while allowing for a dataset-specific baseline rate at which that genus was detected.  
277 Consistent with the GLMM results reported above, in the set-specific method, 18 genera had a maximum a posteriori  
278 (MAP; mode of the posterior distribution) value of their odds larger than 0 (i.e., a positive association between their  
279 presence and PTB) and seven genera had MAP smaller than 0 (Supplementary Figure S14). Meaningful differences  
280 emerged when accounting for dataset-specific detection rates in some genera. For example, the set-specific method  
281 estimated a significant and positive association between the presence of *Gardnerella* and PTB, while the pooling  
282 method estimated a significant and negative association (Figure 5B). Further inspection of this result revealed  
283 different detection rates of *Gardnerella* by most of the V1-V2 and the V4 studies. In Supplementary Figure S4B,  
284 for example, we observed that the prevalence of *Gardnerella* at three V1-V2 studies (Br: 10%, Ki: 7%, St: 25%) are  
285 much lower than in all V4 studies. This result suggests that accounting for dataset-specific detection rates might be  
286 important when aggregating results across microbiome studies.

## 287 Discussion

288 The identification of robust associations between host-associated microbiomes and health outcomes remains an  
289 elusive goal in many areas of microbiome research, as highlighted by many examples of specific associations that  
290 did not reproduce across studies (Callahan et al., 2017; Huybrechts et al., 2020; Wirbel et al., 2019). There are  
291 several potential reasons for this. Most microbiome studies to date have been underpowered when considering  
292 the substantial temporal and inter-individual variability of host-associated microbial communities. Rapid progress  
293 in the laboratory and computational methods used to study microbiomes means that any two microbiome studies  
294 likely used measurement protocols different enough to make their results quantitatively incomparable (Martin, 2019;  
295 McLaren et al., 2019; Tierney et al., 2022). The interaction between microbiomes and the host is mediated by poorly  
296 understood, and hence largely unrecorded, environmental and individual factors. And myriad other challenges  
297 that are generic beyond microbiome studies, such as differences between study populations and the criteria used  
298 to define cases and controls. With these challenges in mind, we used a machine-learning and meta-analysis  
299 approach to study the relationship between the vaginal microbiome and preterm birth across 12 independent  
300 datasets consisting of taxonomic profiles obtained by 16S rRNA gene sequencing of vaginal swabs obtained during  
301 gestations that resulted in term and preterm births. Overall, this analysis revealed substantial heterogeneity in the  
302 relationship between vaginal microbiome measurements and preterm birth outcomes from different studies. Yet,  
303 generalizable results and lessons also emerged, perhaps most importantly the higher predictivity of the vaginal  
304 microbiome for earlier preterm births.

305 Earlier preterm births (< 32 weeks, < 34 weeks) were more predictable from the composition of the vaginal  
306 microbiome than were late preterm births (34-37 weeks). This pattern was observed across most of the seven  
307 datasets included in our analysis of PTB sub-categories. It was observed both in ML models that were trained  
308 and tested in the same dataset and in ML models that were trained in one dataset and tested in another. The two  
309 datasets (Ta and Fe) in which this pattern was not evident were also the two datasets in which PTB was the least  
310 predictable overall. A strength of this analysis is the strong control of between-study differences: Comparisons are  
311 being made between early and late preterm births within a study, and the number of preterm births in each category  
312 per study is held constant. We believe these results support the prioritization of earlier preterm birth (< 34 weeks,  
313 or even earlier) in future studies of the relationship between the vaginal microbiome and PTB. Prioritization of earlier  
314 preterm births is consistent with their much higher morbidity and mortality. It is also supported by the arbitrariness  
315 of the 37-week cutoff, which can result in weak differences between term births (37 - 40 weeks) and the late preterm  
316 births (i.e., 34 - 37 weeks) that predominate in study cohorts targeting all preterm births.

317 Our meta-analysis of these 12 independent vaginal microbiome datasets increases the credibility of reported  
318 associations between *L. crispatus* and reduced risk of preterm birth, reported associations between *Gardnerella*  
319 and *Prevotella* and increased risk of preterm birth, and the different roles played by *L. iners* compared to other  
320 vaginal *Lactobacilli*. The most consistent finding across individual datasets was the negative association between  
321 the relative abundance of *L. crispatus* and preterm birth: 10 out of 12 datasets showed the same direction of effect.  
322 In 6 of these, the association had a raw p-value < 0.05. In our machine learning models, *L. crispatus* had the highest  
323 average importance across all studies for predicting PTB. When considering all datasets together, the association  
324 between the presence of *L. crispatus* and reduced risk of preterm birth was highly significant ( $p = 0.007$ ) and was  
325 stronger for earlier preterm births. The association between *L. iners* and preterm birth was different from the other  
326 vaginal *Lactobacilli*: *L. iners* was associated with increased PTB risk in most individual studies, across all studies  
327 considered together, and more significantly so in earlier preterm births. Although the presence of several genera was  
328 associated with a higher risk of preterm birth when considering all studies together, *Gardnerella* was the genus most  
329 consistently associated with a higher risk of preterm birth at the individual-dataset level. *Prevotella* was the second  
330 most important taxa on average across our machine learning models. When all studies were considered together  
331 it had the second most significant association with PTB and even stronger effect size and statistical significance in  
332 earlier preterm birth.

333 Two example taxa, *Aerococcus* and *Gardnerella*, demonstrate the important ways that differences in taxon-specific  
334 detection rates across studies can alter measured associations between the microbiome and preterm birth. In the  
335 cross-dataset meta-analysis, *Aerococcus* comprised a small to vanishing fraction of the vaginal microbiome and the  
336 presence of *Aerococcus* was marginally associated with higher PTB risk. In contrast, in the Ro dataset, *Aerococcus*  
337 was significantly associated with decreased PTB risk and was detected at a significantly higher baseline rate. ML  
338 models trained on Ro have *Aerococcus* as the most important genus for predicting PTB, whereas *Aerococcus* has  
339 little to no importance in models trained on other datasets. The importance of *Aerococcus* in Ro-trained models  
340 reduces their prediction accuracy in other datasets; the cross-dataset accuracy of models trained on Ro is higher  
341 when the *Aerococcus* feature is removed prior to training. We do not know what is driving this significant difference  
342 in the detection rate of *Aerococcus*, it could reflect real differences between the populations studied in Ro versus  
343 other studies, or it could reflect methodological differences such as a higher detection efficiency for *Aerococcus*

344 of the primer mixture used in the Ro study. In another example, the taxon *Gardnerella*, it has been known for  
345 some time that common V1 primers used in several studies here do not effectively amplify *Gardnerella* or the  
346 related *Bifidobacterium* (Frank et al., 2008; Romero et al., 2014). Consistent with this, we observed much lower  
347 proportions of *Gardnerella* in the V1-V2 studies, especially the Br, Ki, and St studies, that did not supplement their  
348 primer mixtures to detect *Gardnerella* better. Left unaddressed, this interfered with the cross-study estimation of  
349 the association between *Gardnerella* presence and preterm birth. Naively pooling the samples from all studies  
350 together led to the estimation of a negative association between *Gardnerella* and preterm birth. However, when  
351 our modeling incorporated study-specific differences in detection rates, *Gardnerella* was found to be significantly  
352 positively associated with preterm birth, in line with most reports in the literature.

353 The complex heterogeneities between different datasets significantly impede obtaining robustly generalizable results.  
354 The relative paucity of available subject metadata did not allow for post-hoc control of many individual characteristics  
355 thought to modulate the vaginal microbiome, PTB risk, or both. Although maternal race, age, BMI, and gestational  
356 age at delivery were available from most datasets, several other important metadata were only available in some  
357 or a few datasets. For example, the definition of spontaneous vs. indicated PTB was only available for three  
358 datasets, while two datasets reported mixed spontaneous or indicated PTB. Prior history of preterm birth, which is  
359 a known risk factor for PTB, was only recorded for three datasets. Other complications such as pre-eclampsia and  
360 gestational diabetes, which are associated with a higher risk of PTB, were also underreported. Data on feminine  
361 hygiene practices such as douching was unavailable for several studies and has recently been reported to alter the  
362 relationship between the vaginal microbiome and preterm birth in white women (Nieves-Ramírez et al., 2021). It is  
363 therefore important that future studies capture and report comprehensive and detailed patient metadata that permit  
364 deeper analyses of potential confounding (Mirzayi et al., 2021).

365 When considering all-cause and all-type PTB, we found that the predictivity of PTB from the composition of the  
366 vaginal microbiome was low to modest. This should not be surprising. PTB is a syndrome with multiple causes,  
367 and it is highly unlikely that PTBs arising from different causal mechanisms, e.g., indicated PTB due to placenta  
368 previa versus spontaneous preterm labor due to intrauterine infection (Chan et al., 2022), will associate with similar  
369 patterns in the vaginal microbiome. Indeed it is likely that some etiologies of preterm birth will have no measurable  
370 relationship with the vaginal microbiome, and their inclusion in ML models would restrict the predictive accuracy.  
371 However, prediction of well-defined subtypes of PTB from the vaginal microbiome with moderate to high accuracy  
372 needed for clinical relevance may be achievable.

373 The cross-dataset and leave-one-dataset-out machine learning results highlight the importance of careful  
374 interpretation when evaluating the generalizability of machine learning classifiers trained on microbiome data and  
375 indicate that single-study examples of high AUC should be met with caution. Figure 2B presents a classifier trained  
376 on the Br dataset that performs moderately well when tested on withheld test data from the same study (AUC = 0.68).  
377 However, it performs much worse when tested on data from other studies (average AUC = 0.52). This same behavior  
378 can be seen in previous microbiome meta-analyses that explored cross-dataset predictivity using machine learning  
379 (Thomas et al., 2019; Wirbel et al., 2019). However, such analyses can also highlight differences in the underlying  
380 microbiota-host interactions of different patient cohorts. The Br dataset was enriched for PTB cases preceded by  
381 preterm prelabor rupture of the fetal membranes (PPROM), which is often associated with an infectious etiology  
382 (Bennett et al., 2020). Thus, despite producing a highly accurate within-study classifier, the performance of this  
383 classifier may not be maintained in other cohorts where population characteristics (e.g., PPRM prevalence) differ  
384 substantially. Methodological differences in DNA extraction or sequencing may also restrict cross-study classification  
385 accuracy. Consistent with this, we found that combining datasets for training ML models (the LODO analyses)  
386 did not meaningfully improve cross-dataset prediction accuracy versus using a single dataset for training. This is  
387 different than the meaningful improvements in accuracy obtained by pooling studies together reported for predicting  
388 colorectal cancer from the gut microbiome in Thomas et al. (2019) and Wirbel et al. (2019). The reasons for this  
389 difference remain unclear but could arise from the higher heterogeneity of vaginal microbiome studies or even the  
390 PTB phenotype itself.

391 Finally, we make three suggestions for future studies of the vaginal microbiome and PTB studies: (1) earlier preterm  
392 birth should be prioritized, (2) the core genera discussed in this meta-analysis should be captured in future studies  
393 to reflect the community of the vaginal microbiome and (3) comprehensive subject metadata should be recorded,  
394 accounted for within data modeling and made available to the wider research community. Specifically, we recommend  
395 capturing and reporting maternal race, age, BMI, prior history of PTB, the use of interventions designed to prevent  
396 preterm birth, gestational age at delivery, gestational age at the time of sample collection, and whether PTB was  
397 spontaneous or indicated.

## 398 Methods

### 399 Data Collection and Availability

400 We included 12 datasets that at least have raw sequence data and minimal metadata, including subject/sample ID  
401 identifier and gestational age at sampling, that are available to us. Additional metadata were also collected if they are  
402 available, including maternal age, BMI, self-reported race, prior PTB, PPRM, PTB type (spontaneous or indicate),  
403 gestational complication and intervention. The raw sequence data and metadata were downloaded from the NCBI  
404 Sequence Read Archive, or obtained from the supplementary materials of original papers, or directly shared by  
405 authors. See Supplementary Table S1 for details.

### 406 Bioinformatics

407 DADA2 (Callahan et al., 2016) was used to process the raw sequence data and infer the amplicon sequence  
408 variants (ASVs). The details of the DADA2 pipeline for each study can be found in Supplementary Table 2. To  
409 obtain comparable ASVs among datasets, we divided the datasets into two groups based on the region of the 16S  
410 gene that was sequenced (V1-V2 and V4) with five datasets in the V1-V2 group and seven datasets in the V4  
411 group. Then we truncated the original ASVs separately for each group to a common V1-V2 or V4 region in three  
412 steps: (1) align the original ASVs to the SILVA reference database using the mothur software (Schloss et al., 2009);  
413 (2) identify the overlapping sequencing region common to all ASVs in the group using an alignment visualization  
414 tool (MSAviewer); (3) truncate the original ASVs and remove alignment gaps using the extractalign and degapseq  
415 commands. Furthermore, we assigned the taxonomy levels to each truncated ASV using DADA2. *Lactobacillus*  
416 species were assigned manually using BLAST against sequences from cultured *Lactobacillus* strains.

### 417 Data processing

418 Samples with total reads less than 100 were excluded in the analysis. The 25 core genera/species were obtained by  
419 the following steps: (1) assign the genus-level (species-level for *Lactobacillus*) name to “common” ASVs and “top”  
420 ASVs for both the V1-V2 and V4 groups; (2) match the genus level features between V1-V2 and V4 groups from  
421 both “common” and “top” sets; (3) filter the genera using the following criteria (i) at least 5 datasets have the average  
422 relative abundance > 0.1%; (ii) at least 5 datasets have the average prevalence > 10% (Supplementary Figure S4) .  
423 For longitudinal datasets, we obtained the subject-level proportions of each genus by averaging the proportions from  
424 samples in the same subject.

### 425 Machine Learning

426 A machine learning framework using random forest classifier was employed for intra-dataset, cross-dataset, and  
427 leave-one-dataset-out (LODO) analysis. Intra-dataset analysis was performed on a single dataset using 5-fold  
428 cross-validation. Cross-dataset analysis was performed based on a pair of two datasets: one dataset as a training set  
429 and the other as a testing set. LODO analysis was performed by combining all datasets as a training set except one  
430 hold-out dataset as a testing set (see Figure 2A). Given the predicted and true results, the area under the receiver  
431 operating characteristic curve (AUC) is calculated using the ‘pROC’ R package. The AUC from intra-analysis was  
432 averaged among 20 repetitions. We performed ten repetitions of intra-dataset, cross-dataset and LODO analysis in  
433 the preterm birth subgroup analysis and calculated the average AUC. The random forest classifier was implemented  
434 using the ‘randomForest’ R package. We set the hyperparameter nTree = 1000, and tuned mtry using the ‘caret’ R  
435 package.

### 436 Feature Importance

437 We used the SHAP value from the random forest classifier to determine the feature importance. SHAP values that  
438 are large in absolute value indicate that the corresponding feature was influential in the machine learning prediction  
439 for the given sample. Here positive SHAP values indicate that the feature value is associated with preterm birth  
440 whereas negative SHAP values indicate that the feature value is associated with term birth. We trained random  
441 forest models on each dataset using the scikit-learn implementation of a random forest classifier. For each dataset,  
442 we used 5-fold cross-validation with ten repetitions and calculated the SHAP values (Lundberg and Lee, 2017) of the  
443 validation data using the Tree SHAP algorithm (Lundberg et al., 2020) as implemented in the SHAP package. The  
444 features were ranked according to the importance of each study by comparing the mean absolute SHAP values.

### 445 Data Transformation

446 Due to the arbitrary sequencing read depth of each sample, we first converted count data obtained from the DADA2  
447 pipeline to proportional abundance data by dividing the read depth of each sample. As the proportional abundance

448 data does not account for the compositionality of the microbiome data, we further performed the centered log-ratio  
449 (CLR) transformation (with  $10^{-6}$  pseudo-abundance) and compared the performance with proportional data in the  
450 ML framework and DA analysis. We found that data with CLR transformation have a similar prediction accuracy with  
451 the proportional abundance data using the ML model. The one-side Wilcoxon rank-sum test using CLR-transformed  
452 data or proportional data sometimes give an opposite direction of effect. For genera with low prevalence and low  
453 abundance, if CLR-transformed data is used to do analysis, their effects on preterm birth are mostly determined by  
454 the geometric mean of all genera, instead of their own abundance. However, if proportional data are used, their  
455 effects are only determined by their own abundance. In addition, we also included additive log-ratio (ALR), natural  
456 logarithm (log), and rank transformation methods in the ML framework comparison.

## 457 **Statistical Analysis**

A one-sided Wilcoxon rank-sum test was used to perform the dataset-specific differential abundance analysis and implemented using the `wilcox.test` function in R. A generalized linear mixed model was used to do differential abundance analysis with a random effect for each study. Specifically, for each genus we fitted the following model:

$$\text{logit}(P(Y = PTB) = Genus + Race + BMI + Age + (1|Study))$$

458 Genus=1 if a genus is present based on an abundance threshold of 0.001 and 0 otherwise. Race represents the  
459 maternal race; BMI represents the maternal BMI; Age represents the maternal age. The generalized linear mixed  
460 model was implemented using the `glmer` function in the 'lme4' R package. Due to missing maternal race, BMI, and  
461 age in some datasets and non-significance of these covariates except self-reported Black race vs. white race ( $p =$   
462 0.04), we also fitted the model without adjusting these covariates.

463 We further performed a Bayesian analysis by assuming that (1) the log odds of the presence of a genus given  
464 preterm birth follow a uniform prior distribution for each dataset; (2) the odds ratio between PTB and TB has the  
465 same underlying true distribution for each dataset. We use a uniform prior distribution for the odds ratio for the  
466 first dataset, then calculate the posterior distribution. Then we let the posterior distribution of the odds ratio from  
467 the first dataset be the prior distribution for the second dataset and update the posterior distribution. We repeated  
468 the process until the last dataset to obtain the final posterior distribution of the odds ratio. See the Supplementary  
469 Methods section for more details.

## 470 **Ethics Statement**

471 The study was approved by the Institutional Review Board of North Carolina State University (Protocol Number  
472 23575).

## 473 Bibliography

- 474 Bennett, P. R., Brown, R. G., and MacIntyre, D. A. Vaginal microbiome in preterm rupture of membranes. *Obstetrics and*  
475 *Gynecology Clinics*, 47(4):503–521, 2020.
- 476 Blostein, F., Gelaye, B., Sanchez, S. E., Williams, M. A., and Foxman, B. Vaginal microbiome diversity and preterm birth: results  
477 of a nested case–control study in peru. *Annals of epidemiology*, 41:28–34, 2020.
- 478 Brown, R. G., Marchesi, J. R., Lee, Y. S., Smith, A., Lehne, B., Kindinger, L. M., Terzidou, V., Holmes, E., Nicholson, J. K.,  
479 Bennett, P. R., et al. Vaginal dysbiosis increases risk of preterm fetal membrane rupture, neonatal sepsis and is exacerbated  
480 by erythromycin. *BMC medicine*, 16(1):1–15, 2018.
- 481 Brown, R. G., Al-Memar, M., Marchesi, J. R., Lee, Y. S., Smith, A., Chan, D., Lewis, H., Kindinger, L., Terzidou, V., Bourne, T.,  
482 et al. Establishment of vaginal microbiota composition in early pregnancy and its association with subsequent preterm prelabor  
483 rupture of the fetal membranes. *Translational Research*, 207:30–43, 2019.
- 484 Callahan, B. J., McMurdie, P. J., Rosen, M. J., Han, A. W., Johnson, A. J. A., and Holmes, S. P. Dada2: High-resolution sample  
485 inference from illumina amplicon data. *Nature methods*, 13(7):581–583, 2016.
- 486 Callahan, B. J., DiGiulio, D. B., Goltsman, D. S. A., Sun, C. L., Costello, E. K., Jeganathan, P., Biggio, J. R., Wong, R. J., Druzin,  
487 M. L., Shaw, G. M., et al. Replication and refinement of a vaginal microbial signature of preterm birth in two racially distinct  
488 cohorts of us women. *Proceedings of the National Academy of Sciences*, 114(37):9966–9971, 2017.
- 489 Chan, D., Bennett, P. R., Lee, Y. S., Kundu, S., Teoh, T., Adan, M., Ahmed, S., Brown, R. G., David, A. L., Lewis, H. V., et al.  
490 Microbial-driven preterm labour involves crosstalk between the innate and adaptive immune response. *Nature communications*,  
491 13(1):1–15, 2022.
- 492 Chawanpaiboon, S., Vogel, J. P., Moller, A.-B., Lumbiganon, P., Petzold, M., Hogan, D., Landoulsi, S., Jampathong, N.,  
493 Kongwattanakul, K., Laopaiboon, M., et al. Global, regional, and national estimates of levels of preterm birth in 2014: a  
494 systematic review and modelling analysis. *The Lancet Global Health*, 7(1):e37–e46, 2019.
- 495 DiGiulio, D. B., Callahan, B. J., McMurdie, P. J., Costello, E. K., Lyell, D. J., Robaczewska, A., Sun, C. L., Goltsman, D. S., Wong,  
496 R. J., Shaw, G., et al. Temporal and spatial variation of the human microbiota during pregnancy. *Proceedings of the National*  
497 *Academy of Sciences*, 112(35):11060–11065, 2015.
- 498 Donders, G., Van Calsteren, K., Bellen, G., Reybrouck, R., Van den Bosch, T., Riphagen, I., and Van Lierde, S. Predictive value  
499 for preterm birth of abnormal vaginal flora, bacterial vaginosis and aerobic vaginitis during the first trimester of pregnancy.  
500 *BJOG: An International Journal of Obstetrics & Gynaecology*, 116(10):1315–1324, 2009.
- 501 Elovitz, M. A., Gajer, P., Riis, V., Brown, A. G., Humphrys, M. S., Holm, J. B., and Ravel, J. Cervicovaginal microbiota and local  
502 immune response modulate the risk of spontaneous preterm delivery. *Nature communications*, 10(1):1–8, 2019.
- 503 Ferrero, D. M., Larson, J., Jacobsson, B., Di Renzo, G. C., Norman, J. E., Martin Jr, J. N., D’alton, M., Castelazo, E., Howson,  
504 C. P., Sengpiel, V., et al. Cross-country individual participant analysis of 4.1 million singleton births in 5 countries with very  
505 high human development index confirms known associations but provides no biologic explanation for 2/3 of all preterm births.  
506 *PLoS one*, 11(9):e0162506, 2016.
- 507 Fettweis, J. M., Serrano, M. G., Brooks, J. P., Edwards, D. J., Girerd, P. H., Parikh, H. I., Huang, B., Arodz, T. J., Edupuganti, L.,  
508 Glascock, A. L., et al. The vaginal microbiome and preterm birth. *Nature medicine*, 25(6):1012–1021, 2019.
- 509 Frank, J. A., Reich, C. I., Sharma, S., Weisbaum, J. S., Wilson, B. A., and Olsen, G. J. Critical evaluation of two primers commonly  
510 used for amplification of bacterial 16s rna genes. *Applied and environmental microbiology*, 74(8):2461–2470, 2008.
- 511 Goldenberg, R. L. and Culhane, J. F. Infection as a cause of preterm birth. *Clinics in perinatology*, 30(4):677–700, 2003.
- 512 Goldenberg, R. L., Culhane, J. F., Iams, J. D., and Romero, R. Epidemiology and causes of preterm birth. *The lancet*, 371(9606):  
513 75–84, 2008.
- 514 Gudnadottir, U., Debelius, J. W., Du, J., Hugerth, L. W., Danielsson, H., Schuppe-Koistinen, I., Fransson, E., and Brusselaers, N.  
515 The vaginal microbiome and the risk of preterm birth: a systematic review and network meta-analysis. *Scientific reports*, 12  
516 (1):1–8, 2022.
- 517 Haque, M. M., Merchant, M., Kumar, P. N., Dutta, A., and Mande, S. S. First-trimester vaginal microbiome diversity: A potential  
518 indicator of preterm delivery risk. *Scientific reports*, 7(1):1–10, 2017.
- 519 Huybrechts, I., Zouiouich, S., Loobuyck, A., Vandenbulcke, Z., Vogtmann, E., Pisanu, S., Iguacel, I., Scalbert, A., Indave, I.,  
520 Smelov, V., et al. The human microbiome in relation to cancer risk: A systematic review of epidemiologic studies the human  
521 microbiome and cancer risk. *Cancer Epidemiology, Biomarkers & Prevention*, 29(10):1856–1868, 2020.
- 522 Kindinger, L. M., Bennett, P. R., Lee, Y. S., Marchesi, J. R., Smith, A., Cacciatore, S., Holmes, E., Nicholson, J. K., Teoh, T., and  
523 MacIntyre, D. A. The interaction between vaginal microbiota, cervical length, and vaginal progesterone treatment for preterm  
524 birth risk. *Microbiome*, 5(1):1–14, 2017.
- 525 Kosti, I., Lyalina, S., Pollard, K. S., Butte, A. J., and Sirota, M. Meta-analysis of vaginal microbiome data provides new insights  
526 into preterm birth. *Frontiers in Microbiology*, 11:476, 2020.
- 527 Lundberg, S. M. and Lee, S.-I. A unified approach to interpreting model predictions. *Advances in neural information processing*  
528 *systems*, 30, 2017.
- 529 Lundberg, S. M., Erion, G., Chen, H., DeGrave, A., Prutkin, J. M., Nair, B., Katz, R., Himmelfarb, J., Bansal, N., and Lee, S.-I.  
530 From local explanations to global understanding with explainable ai for trees. *Nature machine intelligence*, 2(1):56–67, 2020.
- 531 Manuck, T. A., Rice, M. M., Bailit, J. L., Grobman, W. A., Reddy, U. M., Wapner, R. J., Thorp, J. M., Caritis, S. N., Prasad, M.,  
532 Tita, A. T., et al. Preterm neonatal morbidity and mortality by gestational age: a contemporary cohort. *American journal of*  
533 *obstetrics and gynecology*, 215(1):103–e1, 2016.
- 534 Martin, J. Reproducibility: the search for microbiome standards, 2019.
- 535 McLaren, M. R., Willis, A. D., and Callahan, B. J. Consistent and correctable bias in metagenomic sequencing experiments. *Elife*,  
536 8:e46923, 2019.
- 537 Mirzayi, C., Renson, A., Zohra, F., Elsafoury, S., Geistlinger, L., Kasselmann, L. J., Eckenrode, K., van de Wijgert, J., Loughman,  
538 A., Marques, F. Z., et al. Reporting guidelines for human microbiome research: the storms checklist. *Nature medicine*, 27(11):  
539 1885–1892, 2021.
- 540 Mizrahi-Man, O., Davenport, E. R., and Gilad, Y. Taxonomic classification of bacterial 16s rna genes using short sequencing  
541 reads: evaluation of effective study designs. *PLoS one*, 8(1):e53608, 2013.



- 542 Nieves-Ramírez, M., Partida-Rodríguez, O., Moran, P., Serrano-Vázquez, A., Pérez-Juárez, H., Pérez-Rodríguez, M., Arrieta, M.,  
543 Ximénez-García, C., and Finlay, B. Cervical squamous intraepithelial lesions are associated with differences in the vaginal  
544 microbiota of mexican women. *Microbiology Spectrum*, 9(2):e00143–21, 2021.
- 545 Onderdonk, A. B., Delaney, M. L., and Fichorova, R. N. The human microbiome during bacterial vaginosis. *Clinical microbiology  
546 reviews*, 29(2):223–238, 2016.
- 547 Pasolli, E., Truong, D. T., Malik, F., Waldron, L., and Segata, N. Machine learning meta-analysis of large metagenomic datasets:  
548 tools and biological insights. *PLoS computational biology*, 12(7):e1004977, 2016.
- 549 Romero, R., Hassan, S. S., Gajer, P., Tarca, A. L., Fadrosh, D. W., Bieda, J., Chaemsaitong, P., Miranda, J., Chaiworapongsa,  
550 T., and Ravel, J. The vaginal microbiota of pregnant women who subsequently have spontaneous preterm labor and delivery  
551 and those with a normal delivery at term. *Microbiome*, 2(1):1–15, 2014.
- 552 Schaaf, J. M., Liem, S. M., Mol, B. W. J., Abu-Hanna, A., and Ravelli, A. C. Ethnic and racial disparities in the risk of preterm  
553 birth: a systematic review and meta-analysis. *American journal of perinatology*, 30(06):433–450, 2013.
- 554 Schloss, P. D., Westcott, S. L., Ryabin, T., Hall, J. R., Hartmann, M., Hollister, E. B., Lesniewski, R. A., Oakley, B. B., Parks, D. H.,  
555 Robinson, C. J., et al. Introducing mothur: open-source, platform-independent, community-supported software for describing  
556 and comparing microbial communities. *Applied and environmental microbiology*, 75(23):7537–7541, 2009.
- 557 Stafford, G. P., Parker, J. L., Amabebe, E., Kistler, J., Reynolds, S., Stern, V., Paley, M., and Anumba, D. O. Spontaneous  
558 preterm birth is associated with differential expression of vaginal metabolites by lactobacilli-dominated microflora. *Frontiers in  
559 physiology*, 8:615, 2017.
- 560 Stout, M. J., Busam, R., Macones, G. A., and Tuuli, M. G. Spontaneous and indicated preterm birth subtypes: interobserver  
561 agreement and accuracy of classification. *American journal of obstetrics and gynecology*, 211(5):530–e1, 2014.
- 562 Subramaniam, A., Kumar, R., Cliver, S. P., Zhi, D., Szychowski, J. M., Abramovici, A., Biggio, J. R., Lefkowitz, E. J., Morrow, C.,  
563 and Edwards, R. K. Vaginal microbiota in pregnancy: evaluation based on vaginal flora, birth outcome, and race. *American  
564 journal of perinatology*, 33(04):401–408, 2016.
- 565 Tabatabaei, N., Eren, A., Barreiro, L., Yotova, V., Dumaine, A., Allard, C., and Fraser, W. Vaginal microbiome in early pregnancy  
566 and subsequent risk of spontaneous preterm birth: a case–control study. *BJOG: An International Journal of Obstetrics &  
567 Gynaecology*, 126(3):349–358, 2019.
- 568 Thomas, A. M., Manghi, P., Asnicar, F., Pasolli, E., Armanini, F., Zolfo, M., Beghini, F., Manara, S., Karcher, N., Pozzi, C., et al.  
569 Metagenomic analysis of colorectal cancer datasets identifies cross-cohort microbial diagnostic signatures and a link with  
570 choline degradation. *Nature medicine*, 25(4):667–678, 2019.
- 571 Tierney, B. T., Tan, Y., Yang, Z., Shui, B., Walker, M. J., Kent, B. M., Kostic, A. D., and Patel, C. J. Systematically assessing  
572 microbiome–disease associations identifies drivers of inconsistency in metagenomic research. *PLoS biology*, 20(3):e3001556,  
573 2022.
- 574 Topçuoğlu, B. D., Lesniak, N. A., Ruffin IV, M. T., Wiens, J., and Schloss, P. D. A framework for effective application of machine  
575 learning to microbiome-based classification problems. *MBio*, 11(3):e00434–20, 2020.
- 576 Waldenström, U., Aasheim, V., Nilsen, A. B. V., Rasmussen, S., Pettersson, H. J., and Shytt, E. Adverse pregnancy outcomes  
577 related to advanced maternal age compared with smoking and being overweight. *Obstetrics & Gynecology*, 123(1):104–112,  
578 2014.
- 579 Wirbel, J., Pyl, P. T., Kartal, E., Zych, K., Kashani, A., Milanese, A., Fleck, J. S., Voigt, A. Y., Palleja, A., Ponnudurai, R.,  
580 et al. Meta-analysis of fecal metagenomes reveals global microbial signatures that are specific for colorectal cancer. *Nature  
581 medicine*, 25(4):679–689, 2019.
